# Supplementary material
Source: publisher site journal article supplement (https://www.dovepress.com/article/417375)
Supplement: Supplementary file 1 [file get_supplementary_file.php]

**Supplementary File 1.** Differences in the execution of inhalation therapy techniques according to the characteristics of the participants.

| **Characteristics** |  | **MDI with spacer n (%)** | | | **MDI without spacer n (%)** | | | **Multi-dose DPI type Turbuhaler n (%)** | | | **Multi-dose DPI type Accuhaler n (%)** | | | **Single-dose DPI n (%)** | | | **SMI n (%)** | | |
| --- | --- | --- | --- | --- | --- | --- | --- | --- | --- | --- | --- | --- | --- | --- | --- | --- | --- | --- | --- |
|  |  | **Correct** | **Incorrect** | **p Value** | **Correct** | **Incorrect** | **p Value** | **Correct** | **Incorrect** | **p Value** | **Correct** | **Incorrect** | **p Value** | **Correct** | **Incorrect** | **p Value** | **Correct** | **Incorrect** | **p Value** |
| **Sex** | Male | 7 (36 ,8) | 12 (63 ,2) | 0 ,194* | 13 (68 ,4) | 6 (31 ,6) | 0 ,999* | 4 (57 ,1) | 3 (42 ,9) | 0 ,250* | 4 (40 ,0) | 6 (60 ,0) | 0 ,999* | 8 (57 ,1) | 6 (42 ,9) | 0 ,999* | 13 (92 ,9) | 1 (7 ,1) | 0 ,198* |
|  | Female | 11 (61 ,1) | 7 (38 ,9) | 12 (66 ,7) | 6 (33 ,6) | 9 (90 ,0) | 1 (10 ,0) | 2 (28 ,6) | 5 (71 ,4) | 9 (56 ,3) | 7 (43 ,8) | 14 (70 ,0) | 6 (30 ,0) |
| **Age (years)** | Less than 50 | 1 (25 ,0) | 3 (75 ,0) | 0 ,523 | 0 (0 ,0) | 2 (100 ,0) | 0 ,29 | 2 (100 ,0) | 0 (0 ,0) | 0,300 | 0 (0 ,0) | 2 (100 ,0) | 0 ,119 | 1 (50 ,0) | 1 (50 ,0) | 0 ,363 | 3 (100 ,0) | 0 (0 ,0) | 0 ,059 |
|  | 50 to 60 | 1 (25 ,0) | 3 (75 ,0) | 1 (100 ,0) | 0 (0 ,0) | 5 (100 ,0) | 0 (0 ,0) | 0 (0,0) | 0 (0,0) | 1 (50 ,0) | 1 (50 ,0) | 3 (100 ,0) | 0 (0 ,0) |
|  | 61 to 70 | 2 (50 ,0) | 2 (50 ,0) | 4 (66 ,7) | 2 (33 ,3) | 3 (60 ,0) | 2 (40 ,0) | 2 (100 ,0) | 0 (0 ,0) | 4 (100 ,0) | 0 (0 ,0) | 3 (42 ,9) | 4 (57 ,1) |
|  | 71 to 80 | 5 (45 ,5) | 6 (54 ,5) | 6 (66 ,7) | 3 (33 ,3) | 3 (60 ,0) | 2 (40 ,0) | 3 (42 ,9) | 4 (57 ,1) | 5 (62 ,5) | 3 (37 ,5) | 5 (71 ,4) | 2 (28 ,6) |
|  | More than 80 | 9 (64 ,3) | 5 (35 ,7) | 14 (73 ,7) | 5 (26 ,3) | 13 (76 ,5) | 4 (23 ,5) | 1 (16 ,7) | 5 (83 ,3) | 6 (42 ,9) | 8 (57 ,1) | 13 (92 ,9) | 1 (7 ,1) |
| **Educational level** | Basic | 10 (47 ,6) | 11 (52 ,4) | 0 ,788 | 13 (72 ,2) | 5 (27 ,8) | 0 ,449 | 7 (77 ,8) | 2 (22 ,2) | 0 ,923 | 4 (50 ,0) | 4 (50 ,0) | 0 ,175 | 10 (71 ,4) | 4 (28 ,6) | 0 ,099 | 13 (72 ,2) | 5 (27 ,8) | 0 ,623 |
|  | Secondary | 3 (37 ,5) | 5 (62 ,5) | 9 (75 ,0) | 3 (25 ,0) | 3 (75 ,0) | 1 (25 ,0) | 1 (25 ,0) | 3 (75 ,0) | 2 (25 ,0) | 6 (75 ,0) | 10 (90 ,9) | 1 (9 ,1) |
|  | University | 3 (60 ,0) | 2 (40 ,0) | 1 (33 ,3) | 2 (66 ,7) | 2 (66 ,7) | 1 (33 ,3) | 0 (0 ,0) | 4 (100 ,0) | 1 (33 ,3) | 2 (66 ,7) | 1 (100 ,0) | 0 (0 ,0) |
|  | Postgraduate | 2 (66 ,7) | 1 (33 ,3) | 2 (50 ,0) | 2 (50 ,0) | 1 (100 ,0) | 0 (0 ,0) | 1 (100 ,0) | 0 (0 ,0) | 4 (80 ,0) | 1 (20 ,0) | 3 (75 ,0) | 1 (25 ,0) |
| **Socio-economic situation** | Low-low | 0 (0 ,0) | 2 (100 ,0) | 0 ,452 | 2 (100 ,0) | 0 (0 ,0) | 0 ,884 | 0 (0,0) | 0 (0,0) | 0 ,199 | 2 (100 ,0) | 0 (0,0) | 0 ,143 | 0 (0,0) | 0 (0,0) | 0 ,145 | 1 (100 ,0) | 0 (0 ,0) | 0 ,777 |
|  | Low | 5 (62 ,5) | 3 (37 ,5) | 5 (71 ,4) | 2 (28 ,6) | 3 (100 ,0) | 0 (0 ,0) | 1 (50 ,0) | 1 (50 ,0) | 6 (85 ,7) | 1 (14 ,3) | 6 (85 ,7) | 1 (14 ,3) |
|  | Medium-low | 6 (42 ,9) | 8 (57 ,1) | 11 (64 ,7) | 6 (35 ,3) | 7 (77 ,8) | 2 (22 ,2) | 3 (50 ,0) | 3 (50 ,0) | 7 (50 ,0) | 7 (50 ,0) | 13 (72 ,2) | 5 (27 ,8) |
|  | Middle | 5 (71 ,4) | 2 (28 ,6) | 2 (50 ,0) | 2 (50 ,0) | 2 (100 ,0) | 0 (0 ,0) | 0 (0 ,0) | 3 (100 ,0) | 4 (66 ,7) | 2 (33 ,3) | 4 (80 ,0) | 1 (20 ,0) |
|  | Medium-high | 1 (33 ,3) | 2 (66 ,7) | 3 (75 ,0) | 1 (25 ,0) | 0 (0,0) | 0 (0,0) | 0 (0 ,0) | 2 (100 ,0) | 0 (0 ,0) | 2 (100 ,0) | 3 (100 ,0) | 0 (0 ,0) |
|  | High | 1 (33 ,3) | 2 (66 ,7) | 2 (66 ,7) | 1 (33 ,3) | 1 (33 ,3) | 2 (66 ,7) | 0 (0 ,0) | 2 (100 ,0) | 0 (0 ,0) | 1 (100 ,0) | 0 (0,0) | 0 (0,0) |
| **Access to Health** | Taxpayer | 17 (53 ,1) | 15 (46 ,9) | 0 ,340* | 20 (71 ,4) | 8 (28 ,6) | 0 ,432* | 12 (75 ,0) | 4 (55 ,0) | 0 ,999* | 4 (28 ,6) | 10 (71 ,4) | 0 ,515* | 16 (59 ,3) | 11 (40 ,7) | 0 ,565* | 21 (80 ,0) | 5 (19 ,2) | 0 ,999* |
|  | Subsidized | 1 (20 ,0) | 4 (80 ,0) | 5 (55 ,6) | 4 (44 ,4) | 1 (100 ,0) | 0 (0 ,0) | 2 (66 ,7) | 1 (33 ,3) | 1 (33 ,3) | 2 (66 ,7) | 6 (75 ,0) | 2 (25 ,0) |
| **Occupation** | Employee | 1 (100 ,0) | 0 (0 ,0) | **0 ,018** | 1 (50 ,0) | 1 (50 ,0) | 0 ,46 | 1 (100 ,0) | 0 (0 ,0) | 0 ,916 | 1 (100 ,0) | 0 (0 ,0) | 0 ,409 | 1 (100 ,0) | 0 (0 ,0) | 0 ,653 | 1 (50 ,0) | 1 (50 ,0) | 0 ,096 |
|  | Self-Employed | 2 (25 ,0) | 6 (75 ,0) | 7 (87 ,5) | 1 (12 ,5) | 6 (75 ,0) | 2 (25 ,0) | 2 (50 ,0) | 2 (50 ,0) | 3 (50 ,0) | 3 (50 ,0) | 7 (77 ,8) | 2 (22 ,2) |
|  | Retiree | 15 (65 ,2) | 8 (34 ,8) | 14 (66 ,7) | 7 (33 ,3) | 4 (80 ,0) | 1 (20 ,0) | 2 (22 ,2) | 7 (77 ,8) | 12 (60 ,0) | 8 (40 ,0) | 18 (90 ,0) | 2 (10 ,0) |
|  | Unemployed | 0 (0 ,0) | 5 (100 ,0) | 3 (50 ,0) | 3 (50 ,0) | 2 (66 ,7) | 1 (33 ,3) | 1 (33 ,3) | 2 (66 ,7) | 1 (33 ,3) | 2 (66 ,7) | 1 (33 ,3) | 2 (66 ,7) |
| **mMRC Grade** | 0 | 4 (80 ,0) | 1 (20 ,0) | **0 ,008** | 4 (44 ,4) | 5 (55 ,6) | 0 ,448 | 1 (50 ,0) | 1 (50 ,0) | 0 ,208 | 1 (25 ,0) | 3 (75 ,0) | 0 ,175 | 5 (71 ,4) | 2 (28 ,6) | 0 ,221 | 5 (83 ,3) | 1 (16 ,7) | 0 ,882 |
|  | 1 | 0 (0 ,0) | 1 (100 ,0) | 2 (100 ,0) | 0 (0 ,0) | 1 (100 ,0) | 0 (0 ,0) | 0 (0,0) | 0 (0,0) | 0 (0 ,0) | 3 (100 ,0) | 2 (100 ,0) | 0 (0 ,0) |
|  | 2 | 6 (75 ,0) | 2 (25 ,0) | 10 (76 ,9) | 3 (23 ,1) | 1 (33 ,3) | 2 (66 ,7) | 4 (66 ,7) | 2 (33 ,3) | 3 (60 ,0) | 2 (40 ,0) | 8 (80 ,0) | 2 (20 ,0) |
|  | 3 | 7 (63 ,6) | 4 (36 ,4) | 7 (70 ,0) | 3 (30 ,0) | 5 (100 ,0) | 0 (0 ,0) | 1 (33 ,3) | 2 (66 ,7) | 8 (66 ,7) | 4 (33 ,3) | 7 (70 ,0) | 3 (30 ,0) |
|  | 4 | 1 (8 ,3) | 11 (91 ,7) | 2 (66 ,7) | 1 (33 ,3) | 5 (83 ,3) | 1 (16 ,7) | 0 (0 ,0) | 4 (100 ,0) | 1 (33 ,3) | 2 (66 ,7) | 5 (83 ,3) | 1 (16 ,7) |
| **Exacerbations per year** | 0 | 4 (44 ,4) | 5 (55 ,6) | 0 ,519 | 11 (73 ,3) | 4 (26 ,7) | 0 ,156 | 2 (100 ,0) | 0 (0 ,0) | 0 ,3 | 4 (80 ,0) | 1 (20 ,0) | **0 ,042** | 3 (30 ,0) | 7 (70 ,0) | 0 ,111 | 9 (81 ,8) | 2 (18 ,2) | 0 ,842 |
|  | 1 | 12 (54 ,5) | 10 (45 ,5) | 13 (72 ,2) | 5 (27 ,8) | 6 (60 ,0) | 4 (40 ,0) | 2 (18 ,2) | 9 (81 ,8) | 11 (68 ,8) | 5 (31 ,3) | 13 (81 ,3) | 3 (18 ,8) |
|  | 2 | 2 (50 ,0) | 2 (50 ,0) | 1 (25 ,0) | 3 (75 ,0) | 4 (100 ,0) | 0 (0 ,0) | 0 (0,0) | 0 (0,0) | 3 (75 ,0) | 1 (25 ,0) | 5 (71 ,4) | 2 (28 ,6) |
|  | More than 2 | 0 (0 ,0) | 2 (100 ,0) | 0 (0,0) | 0 (0,0) | 1 (100 ,0) | 0 (0 ,0) | 0 (0 ,0) | 1 (100 ,0) | 0 (0,0) | 0 (0,0) | 0 (0,0) | 0 (0,0) |
| **COPD spirometric** pattern | Obstructive | 11 (44 ,0) | 14 (56 ,0) | 0 ,311 | 19 (70 ,4) | 8 (29 ,6) | 0 ,417 | 10 (76 ,9) | 3 (23 ,1) | 0 ,999* | 5 (35 ,7) | 9 (64 ,3) | 0 ,999* | 11 (47 ,8) | 12 (52 ,2) | 0 ,185 | 17 (73 ,9) | 6 (26 ,1) | 0 ,487 |
|  | Restrictive | 5 (50 ,0) | 5 (50 ,0) | 5 (71 ,4) | 2 (28 ,6) | 3 (75 ,0) | 1 (25 ,0) | 1 (33 ,3) | 2 (66 ,7) | 4 (80 ,0) | 1 (20 ,0) | 8 (88 ,9) | 1 (11 ,1) |
|  | Unknown | 2 (100 ,0) | 0 (0 ,0) | 1 (33 ,3) | 2 (66 ,7) | 0 (0,0) | 0 (0,0) | 0 (0,0) | 0 (0,0) | 2 (100 ,0) | 0 (0 ,0) | 2 (100 ,0) | 0 (0 ,0) |
| **GOLD Rating** | Slight | 11 (61 ,1) | 7 (38 ,9) | 0 ,135 | 15 (78 ,9) | 4 (21 ,1) | 0 ,105 | 4 (57 ,1) | 3 (42 ,9) | 0 ,258 | 4 (40 ,0) | 6 (60 ,0) | 0 ,539 | 8 (57 ,1) | 6 (42 ,9) | 0 ,125 | 13 (81 ,3) | 3 (18 ,8) | 0 ,563 |
|  | Moderate | 3 (25 ,0) | 9 (75 ,0) | 9 (64 ,3) | 5 (35 ,7) | 6 (85 ,7) | 1 (14 ,3) | 2 (40 ,0) | 3 (60 ,0) | 0 (0 ,0) | 7 (58 ,3) | 11 (73 ,3) | 4 (26 ,7) |
|  | Very strong | 4 (48 ,6) | 3 (51 ,4) | 1 (25 ,0) | 3 (75 ,0) | 3 (100 ,0) | 0 (0 ,0) | 0 (0 ,0) | 2 (100 ,0) | 4 (100 ,0) | 0 (0 ,0) | 3 (100 ,0) | 0 (0 ,0) |

MDI: metered-dose inhalers; DPI: dry powder inhalers; SMI: Soft mist inhalers.
*: P-value obtained from Fisher's exact test.
